# Supplementary material for: lncRNA DDGC participates in premature ovarian insufficiency through regulating RAD51 and WT1
Source: PubMed Central journal article supplement — Mol Ther Nucleic Acids. 2021 Oct 20;26:1092–106. doi: 10.1016/j.omtn.2021.10.015 (PMC8571528; doi:10.1016/j.omtn.2021.10.015), 2021-10-20
Supplement: mmc1.pdf [file mmc1.pdf]

OMTN, Volume 26

## Supplemental information

**lncRNA *DDGC* participates  
in premature ovarian insufficiency through  
regulating *RAD51* and *WT1***

**Duan Li, Weiwei Xu, Xiaoyan Wang, Yujie Dang, Lan Xu, Gang Lu, Wai-Yee Chan, Peter C.K. Leung, Shidou Zhao, and Yingying Qin**

## Supplementary Figure 1

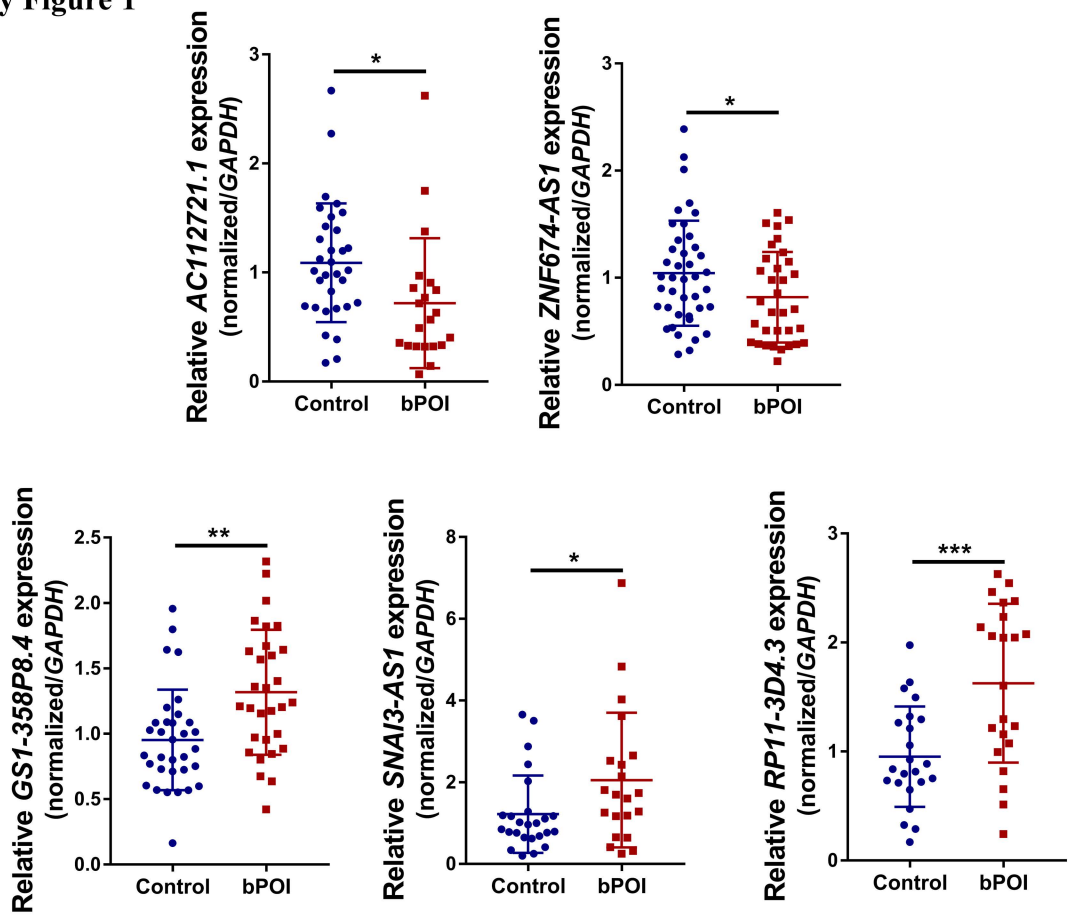

**Supplementary Figure 1.** The expression levels of lncRNAs were validated by qRT-PCR in GCs from controls and bPOI patients. Ct values were normalized to *GAPDH*. Data are presented as the mean  $\pm$  SD. \* $P < 0.05$ , \*\* $P < 0.01$ , \*\*\* $P < 0.001$  by two-tailed Student's t-test.

# Supplementary Figure 2

**A**

## CPC2

| ID                | Label     | Coding probability | Peptide length(aa) | Fickett score | Isoelectric point | ORF integrity | Details |
|-------------------|-----------|--------------------|--------------------|---------------|-------------------|---------------|---------|
| ENST00000464929.5 | noncoding | 0.051056           | 73                 | 0.32494       | 11.4901733398     | complete      | View    |

## CPAT

| Result for species name : hg19 with job ID :1590583809 |                   |          |          |               |                  |                    |              |
|--------------------------------------------------------|-------------------|----------|----------|---------------|------------------|--------------------|--------------|
| Data ID                                                | Sequence Name     | RNA Size | ORF Size | Fickett Score | Hexamer Score    | Coding Probability | Coding Label |
| 0                                                      | ENST00000464929.5 | 819      | 219      | 0.5972        | -0.0726352545543 | 0.012345255995295  | no           |

**B**

| Maximum (TPM) | Average (TPM) | Median (TPM) | CV    | t-Value? | Expression Breadth |
|---------------|---------------|--------------|-------|----------|--------------------|
| 1.403         | 0.368         | 0.335        | 0.893 | 0.752    | 53                 |

Data Set: GTEx

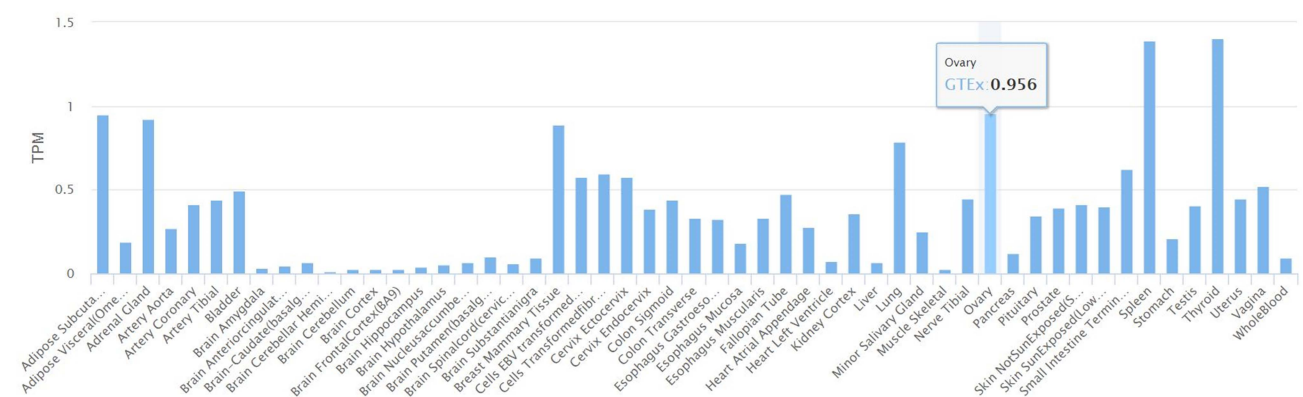

**C**

## DDGC

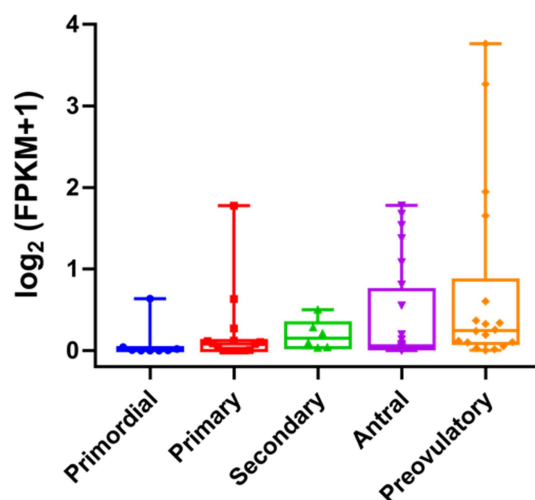

**Supplementary Figure 2.** (A) The coding probability of *DDGC* was assessed by the Coding Potential Calculator (CPC2) and Coding-Potential Assessment Tool (CPAT). (B) The expression levels of *DDGC* in multiple human tissues. Data are based on Genotype-Tissue Expression (GTEx) resources. (C) The expression of *DDGC* in human granulosa cells during folliculogenesis.

**A**

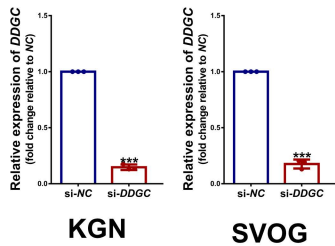

**B**

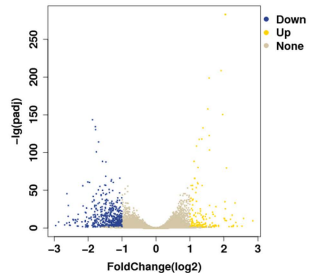

**C**

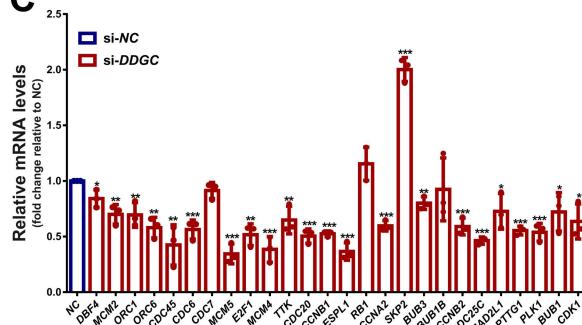

**D**

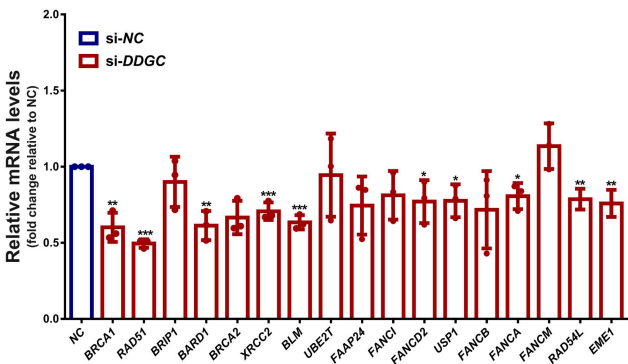

**F**

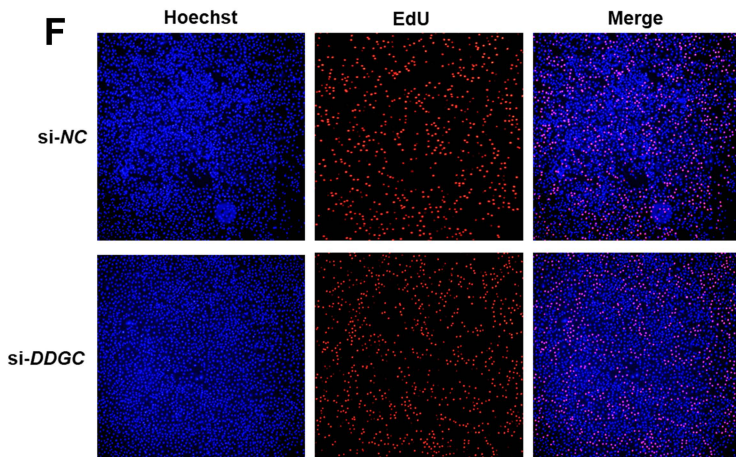

**E**

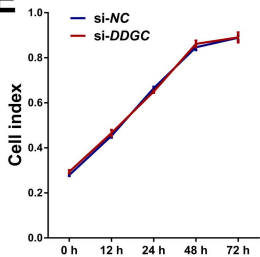

**G**

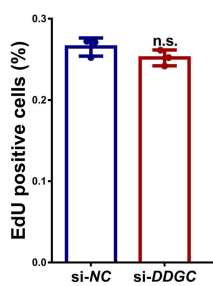

**H**

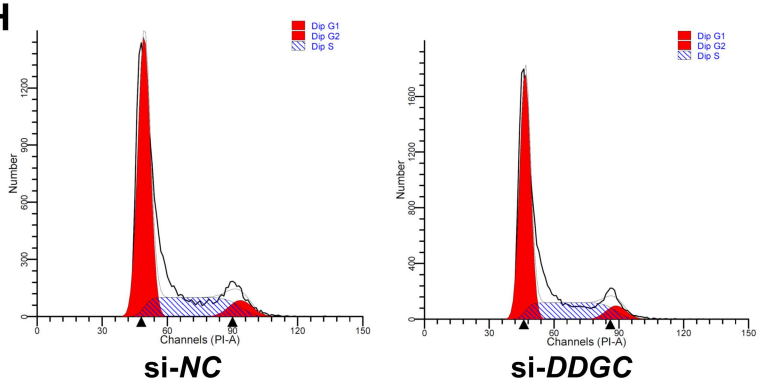

**I**

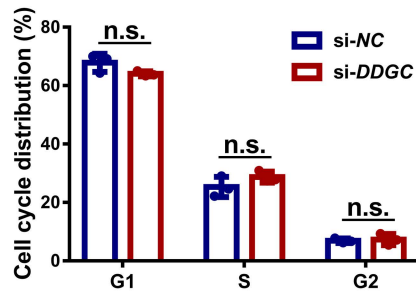

**J**

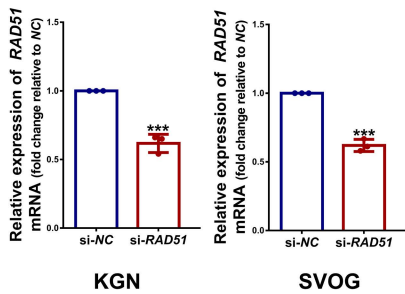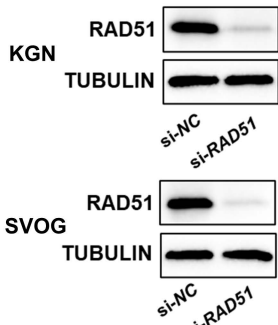

**K**

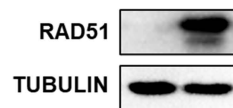

**L**

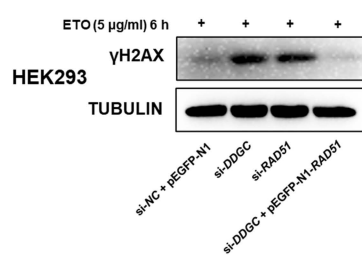

**Supplementary Figure 3.** (A) The efficiency of *DDGC* silencing in KGN and SVOG cells was measured by qRT-PCR. (B) Volcano plot of differentially expressed mRNAs between *DDGC*-silenced (n = 2) and negative control KGN cells (n = 2). (C, D) qRT-PCR was used to validate the expression level of genes involved in cell cycle progression and DNA damage repair in *DDGC*-silenced and negative control KGN cells. (E) Cell viability of *DDGC*-silenced and negative control KGN cells was determined with the CCK8 assay. The results are expressed as the mean  $\pm$  SD (n = 3). (F, G) The proliferative ability of *DDGC*-silenced and negative control KGN cells was measured using an EdU staining assay. The results are expressed as the mean  $\pm$  SD (n = 3). n.s. = not significant by two-tailed Student's t-test. (H, I) The cell cycle distribution of *DDGC*-silenced and negative control KGN cells was determined by flow cytometry analysis. The results are expressed as the mean  $\pm$  SD (n = 3). Two-tailed Student's t-test. (J) *RAD51* mRNA and protein levels in *RAD51*-silenced and negative control KGN and SVOG cells were measured by qRT-PCR and western blot, respectively. (K) The *RAD51* protein levels in *pEGFP-N1-RAD51* and *pEGFP-N1*-transfected HEK293 cells were measured by western blot. (L) The expression of  $\gamma$ H2AX in *DDGC*-silenced, *RAD51*-silenced, co-transfected, and negative control HEK293 cells was measured by western blot. All qRT-PCR values were obtained from triplicate experiments and expressed as the mean  $\pm$  SD (n = 3). \*P < 0.05, \*\*P < 0.01, \*\*\*P < 0.001, n.s. = no significance by two-tailed Student's t-test.

# Supplementary Figure 4

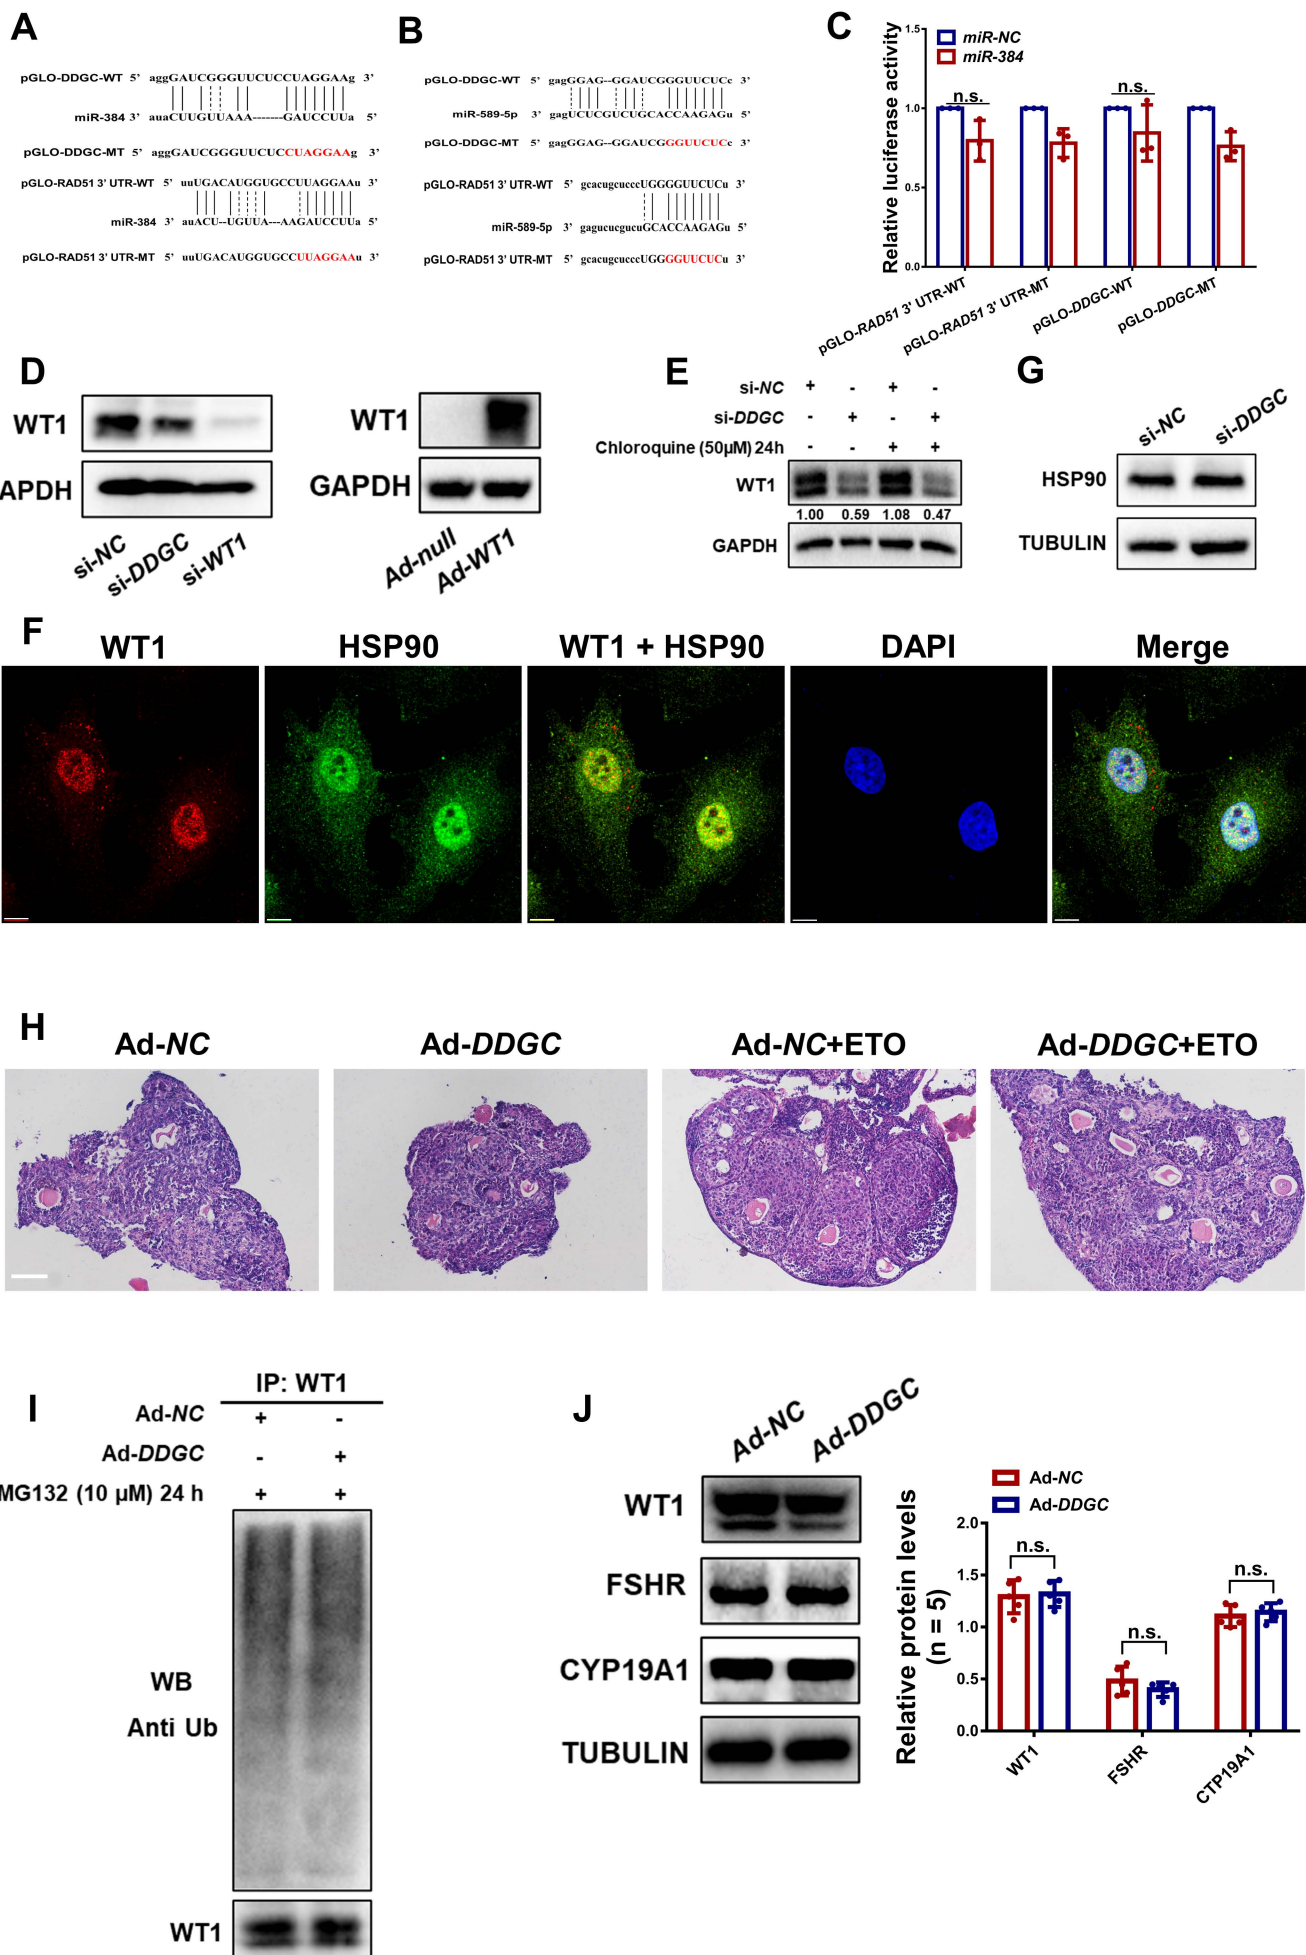

**Supplementary Figure 4. (A, B)** Luciferase reporter vectors were constructed by cloning the wild-type *DDGC* and *RAD51* mRNA 3' UTR sequences or MT sequences into the pmirGLO plasmid. The red nucleotides represent deleted sequences of the target sites. **(C)** Luciferase activity was analyzed at 48 h after co-transfection of reporter vectors and *miR-384* or negative control into HEK293 cells. Results are expressed as the mean  $\pm$  SD (n = 3). n.s. = no significance by two-tailed Student's t-test. **(D)** The protein levels of WT1 in *DDGC*-silenced, *WT1* silenced, *WT1*-overexpressing, and negative control KGN cells were measured by western blot. **(E)** The protein levels of WT1 in *DDGC*-silenced and negative control KGN cells was measured by western blot at 24 h after the addition of chloroquine. **(F)** Subcellular localization of WT1 and HSP90 protein was confirmed by immunofluorescence assay. Scale bars = 10  $\mu$ m. **(G)** The protein levels of HSP90 in *DDGC*-silenced and negative control KGN cells were measured by western blot. **(H)** Representative histological sections of *in vitro* cultured ovaries after *DDGC* over-expression. Scale bar = 50  $\mu$ m. **(I)** Western blot showing the polyubiquitination level of WT1 in *DDGC*-overexpressed and negative control *in vitro* cultured ovaries at 24 h after the addition of MG132. **(J)** The protein levels of WT1, FSHR and CYP19A1 in *DDGC*-overexpressed and negative control mice ovaries were measured by western blot. Relative protein levels are expressed as the mean  $\pm$  SD (n = 5). n.s. = no significance by two-tailed Student's t-test.

**Supplementary Table 1. Fold change of lncRNAs validation**

| <b>Gene<br/>(homo sapiens)</b> | <b>Fold change</b> | <b>P value</b> |
|--------------------------------|--------------------|----------------|
| <i>AC112721.1</i>              | 1.59               | 0.024          |
| <i>ZNF674-AS1</i>              | 1.27               | 0.041          |
| <i>DDGC</i>                    | 2.12               | 0.007          |
| <i>GSI-358P8.4</i>             | 1.34               | 0.001          |
| <i>SNAI3-AS1</i>               | 1.77               | 0.038          |
| <i>RP11-3D4.3</i>              | 1.46               | <0.001         |

**Supplementary Table 2. List of primers used in this study**

| <b>Gene<br/>(homo sapiens)</b> | <b>Forward (5'-3')</b>  | <b>Reverse (5'-3')</b>  |
|--------------------------------|-------------------------|-------------------------|
| <i>AC112721.1</i>              | ACAGCAGCCCTAGCAAACCTAAC | CCTGAGGAACGTGTAAACTGG   |
| <i>ZNF674-AS1</i>              | CCATGCCAGCATTGTCTATTCA  | GGGCTTGAGGCTCTAAAGATGT  |
| <i>DDGC</i>                    | CAGAGCATGGTCATTCAACATT  | TCTAGGGAAACCATCTTGGAGA  |
| <i>GSI-358P8.4</i>             | TCATTGAATAGTGTGGGCTGCT  | CCTTTCCTCCACCTCTGAAACA  |
| <i>SNAI3-AS1</i>               | CATCGCTCCCTCTACACGAG    | TCCTTCTGAGGGGTTGAGTTA   |
| <i>RP11-3D4.3</i>              | AGGATCAGAGCTTTGCCTTCAA  | TATCACCAACTTGGGTGGTCTC  |
| <i>GAPDH</i>                   | GGAGCGAGATCCCTCCAAAAT   | GGCTGTTGCATACTTCTCATGG  |
| <i>DBF4</i>                    | GGGCAAAAGAGTTGGTAGTGG   | ACTTATCGCCATCTGTTTGGATT |
| <i>MCM2</i>                    | ATGATCGAGAGCATCGAGAACC  | GCCAAGTCCTCATAGTTCACCA  |
| <i>ORC1</i>                    | ACCGAGATTCACATCCAGATTGG | CGAGCACGTTTCTTAGGAGGA   |
| <i>ORC6</i>                    | ACAAGGAGACATATCAGAGCTGT | AGTGGCCTGGATAAGTCAAGAT  |
| <i>CDC45</i>                   | GTGGGCCATCGTTGGACTAAC   | TCAAAGGAGATCCGTGTGCAG   |
| <i>CDC6</i>                    | ACCTATGCAAACTCCCCATT    | TGGCTAGTTCTCTTTTGTAGGA  |
| <i>CDC7</i>                    | GAGGCGTCTTTGGGGATTGAG   | GGTCTACTTGTAAGTGTGCTG   |
| <i>MCM5</i>                    | ATGTCGGGATTCGACGATCCT   | CCAGGTTGTAATGCCGCTTG    |
| <i>E2F1</i>                    | CGTGGACTCTTCGGAGAAGTTT  | TGATGGTGGTGGTGACACTATG  |
| <i>MCM4</i>                    | TGAACCTCTATACATGCAACGAC | CAGGGTAACGGTCAAAGAAGATT |
| <i>TTK</i>                     | CGCAGCTTTCTGTAGAAATGGA  | GCAACAACTCAACCAGTCCCTC  |
| <i>CDC20</i>                   | GCACAGTTCGCGTTCGAGA     | CTGGATTGCCAGGAGTTCGG    |
| <i>CCNB1</i>                   | TTGGGGACATTGGTAACAAAGTC | ATAGGCTCAGGCGAAAGTTTTT  |
| <i>ESPL1</i>                   | CTTGAAGGAGTTCTGTCCAACC  | TGGGGTAGACACTAAGTAGCCA  |
| <i>RBI</i>                     | CTCTCGTCAGGCTTGAGTTTG   | GACATCTCATCTAGGTCAACTGC |
| <i>CCNA2</i>                   | GGATGGTAGTTTTGAGTACCAC  | CACGAGGATAGCTCTCATACTGT |
| <i>SKP2</i>                    | GCAAGACTTCTGAACTGTGTC   | TCCCATGAAACACCTGGAAAAGT |
| <i>BUB3</i>                    | TACATTTGCCACAGGTGGTTCT  | TCAAGTACATGGTGACTTGGGT  |



|                                           |                             |                               |
|-------------------------------------------|-----------------------------|-------------------------------|
| <i>BUB1B</i>                              | AAATGACCCTCTGGATGTTTGG      | GCATAAACGCCCTAATTTAAGCC       |
| <i>CCNB2</i>                              | TTGGCTGGTACAAGTCCACTC       | TGGGAAGTGGTATAAGCATTGTC       |
| <i>CDC25C</i>                             | AAGTGGCCTATATCGCTCCC        | CCCTGGTTAGAATCTTCTCCA         |
| <i>MAD2L1</i>                             | GGACTCACCTTGCTTGTAAC TAC    | GATCACTGAACGGATTTCATCCT       |
| <i>PTTG1</i>                              | CTGTCCGCTGTTTAGCTCTTG       | TTTGATTGAAGGTCCAGACCCC        |
| <i>PLK1</i>                               | AAAGAGATCCCGAGGTCCTA        | GGCTGCGGTGAATGGATATTTT        |
| <i>BUB1</i>                               | TCCTTCAGATGCTTGAAGCCC       | GAGGTCACTGTTGTAAGTCAAGCA      |
| <i>CDK1</i>                               | AAACTACAGGTCAAGTGGTAGCC     | TCCTGCATAAGCACATCCTGA         |
| <i>BRCA1</i>                              | TTGTTACAAATCACCCCTCAAGG     | CCCTGATACTTTTCTGGATGCC        |
| <i>RAD51</i>                              | CAACCCATTTCACGGTTAGAGC      | TTCTTTGGCGCATAGGCAACA         |
| <i>RAD54L</i>                             | TTGAGTCAGCTAACCAATCAACC     | GGAGGCTCATAAGCAACCAAGG        |
| <i>BRIP1</i>                              | CTTACCCGTCACAGCTTGCTA       | CACTAAGAGATTGTTGCCATGCT       |
| <i>BARD1</i>                              | TCGCGTTGTAACATTCTGA         | GACAGCTCATGTGATGATGAGCA       |
| <i>BRCA2</i>                              | ACAAGCAACCCAAGTGTCAAT       | TGAAGCTACCTCCAAAAGTGTG        |
| <i>XRCC2</i>                              | TCACCTGTGCATGGTGATATCT      | AGCTTTGGGATAGTCTGTGCTC        |
| <i>BLM</i>                                | CAGACTCCGAAGGAAGTTGTATG     | TTTGGGGTGGTGAACAAATGAT        |
| <i>UBE2T</i>                              | ATCCCTCAACATCGCAACTGT       | CAGCCTCTGGTAGATTATCAAGC       |
| <i>FAAP24</i>                             | GGCCACCAGTAACATGATCTCT      | AAAGTCTGGTGTCAAGCCATCC        |
| <i>FANCI</i>                              | CCACCTTTGGTCTATCAGCTTC      | CAACATCCAATAGCTCGTCACC        |
| <i>FANCD2</i>                             | AAAACGGGAGAGATCAGAATCA      | ACGCTCACAAGACAAAAGGCA         |
| <i>USP1</i>                               | ATGCCTGGTGTACATCCTAGT       | CAGTCCCACAAATGGTAACAAGT       |
| <i>FANCB</i>                              | ATGAAGGATGGCCTAAGGGTC       | ACACACTAACAACCTTTGCCAGT       |
| <i>FANCA</i>                              | TTTGCTTGAGGTAGAAGGTCCA      | CCCGGCTGAGAGAATACCCA          |
| <i>FANCM</i>                              | TCGTGACGGTGGTTACAACAC       | ACAAGACGAATTGGGCTCTTC         |
| <i>MALAT1</i>                             | AAAGTCCGCCATTTTGGCAC        | CTCACAAAACCCCGGAACCT          |
| <i>LMNB1</i>                              | GAAAAAGACAACCTCTCGTCGCA     | GTAAGCACTGATTCCATGTCCA        |
| <i>β-actin</i>                            | ACAGAGCCTCGCCTTTGCC         | GAGGATGCCTCTCTGTCTGTG         |
| <i>FSHR</i>                               | AAAGCTGCCTACTCTGGAAAAG      | GACCCCTAGCCTGAGTCATATAA       |
| <i>CYP19A1</i>                            | TGGAAATGCTGAACCCGATAC       | AATCCCATGCAGTAGCCAGG          |
| <i>WT1</i>                                | CACAGCACAGGGTACGAGAG        | CAAGAGTCGGGGCTACTCCA          |
| <b>Gene<br/>(Mus musculus)</b>            | <b>Forward (5'-3')</b>      | <b>Reverse (5'-3')</b>        |
| <i>Rad51</i>                              | AAGTTTTGGTCCACAGCCTATTT     | CGGTGCATAAGCAACAGCC           |
| <i>Gapdh</i>                              | AGGTCGGTGTGAACGGATTTG       | TGTAGACCATGTAGTTGAGGTCA       |
| <b>Primers for in vitro transcription</b> |                             |                               |
| <i>DDGC AS</i>                            | CTAGCTAGCATTTAAAATAGAAATTTA | ATTTGGGCCCGGCCACACACCCCGAGCCC |

**Supplementary Table 3. Oligonucleotides sequences used in this study**

| <b>siRNAs</b>                           | <b>Sense(5'-3')</b>       |
|-----------------------------------------|---------------------------|
| <i>si-NC</i>                            | UUCUCCGAACGUGUCACGUTT     |
| <i>si-DDGC</i>                          | GGAGAGAAACAGGUAGCAATT     |
| <i>si-RAD51</i>                         | CCAACGAUGUGAAGAAAUUTT     |
| <i>si-WT1</i>                           | GCUUACCCAGGCUGCAAUATT     |
| <b>Biotin labelled miRNAs or probes</b> |                           |
| <i>Bio-NC</i>                           | UUCUCCGAACGUGUCACGUTT     |
| <i>Bio-589-5p</i>                       | UGAGAACCACGUCUGCUCUGAG    |
| <i>Biotin-DDGC-1</i>                    | CAUACAUCUGUCAUGUAACACU    |
| <i>Biotin-DDGC-2</i>                    | CAUACUGAAACUCCUAGGAGA     |
| <i>Biotin-DDGC-3</i>                    | AGGUAGUAGCUUCUAGGGAAAC    |
| <i>Biotin-DDGC-4</i>                    | UGCUACCUGUUUCUCUCCUCAAUCA |
| <i>Biotin-DDGC-5</i>                    | UUGUAUAUCUGGUUUCUAAGAAUGC |
| <i>Biotin-NC-probe</i>                  | GUGUAACACGUCUAUACGCCCA    |

**Supplementary Table 4. List of antibodies used in this study**

| <b>Antibody</b>                             | <b>Supplier</b>           | <b>Catalog#</b> | <b>Application</b> |
|---------------------------------------------|---------------------------|-----------------|--------------------|
| <b>Phospho-Histone H2A.X (Ser139)</b>       | Cell Signaling Technology | 9718S           | WB/IF              |
| <b>GAPDH</b>                                | Proteintech               | 60004-1-Ig      | WB                 |
| <b>PARP (Cleaved Asp214, Asp215)</b>        | Invitrogen                | 44-698G         | WB                 |
| <b><math>\alpha</math>-Tubulin</b>          | Proteintech               | 66031-1-Ig      | WB                 |
| <b>BRCA2</b>                                | Abcam                     | ab27976         | WB                 |
| <b>BARD1</b>                                | Santa Cruz                | sc-74559        | WB                 |
| <b>BRCA1</b>                                | Cell Signaling Technology | #9010           | WB                 |
| <b>Rad51 (D4B10) Rabbit mAb</b>             | Cell Signaling Technology | 8875S           | WB                 |
| <b><math>\beta</math>-Actin</b>             | Proteintech               | 66009-1-Ig      | WB                 |
| <b>Anti-Argonaute-2 antibody [EPR10411]</b> | Abcam                     | ab186733        | RIP                |
| <b>FSHR</b>                                 | Proteintech               | 22665-1-AP      | WB                 |
| <b>Aromatase (D5Q2Y) Rabbit mAb</b>         | Cell Signaling Technology | #14528          | WB                 |
| <b>FoxO1 (C29H4) Rabbit mAb</b>             | Cell Signaling Technology | 2880T           | WB                 |
| <b>Anti-Wilms Tumor Protein antibody</b>    | Abcam                     | ab89901         | WB/IF              |
| <b>WT1 (F-6)</b>                            | Santa Cruz                | sc-7385         | IP                 |
| <b>Ubiquitin (P4D1) Mouse mAb</b>           | Cell Signaling Technology | 3936T           | WB                 |
| <b>HSP90</b>                                | Abcam                     | ab13492         | IP/RIP             |
| <b>HSP90 (C45G5) Rabbit mAb</b>             | Cell Signaling Technology | #4877           | WB/IF              |
| <b>Anti-Lamin B1 antibody</b>               | Abcam                     | ab16048         | WB                 |
| <b>Anti-Aromatase</b>                       | Abcam                     | ab18995         | WB                 |
